# Supplementary material
Source: PubMed Central journal article supplement (PMC9022200)

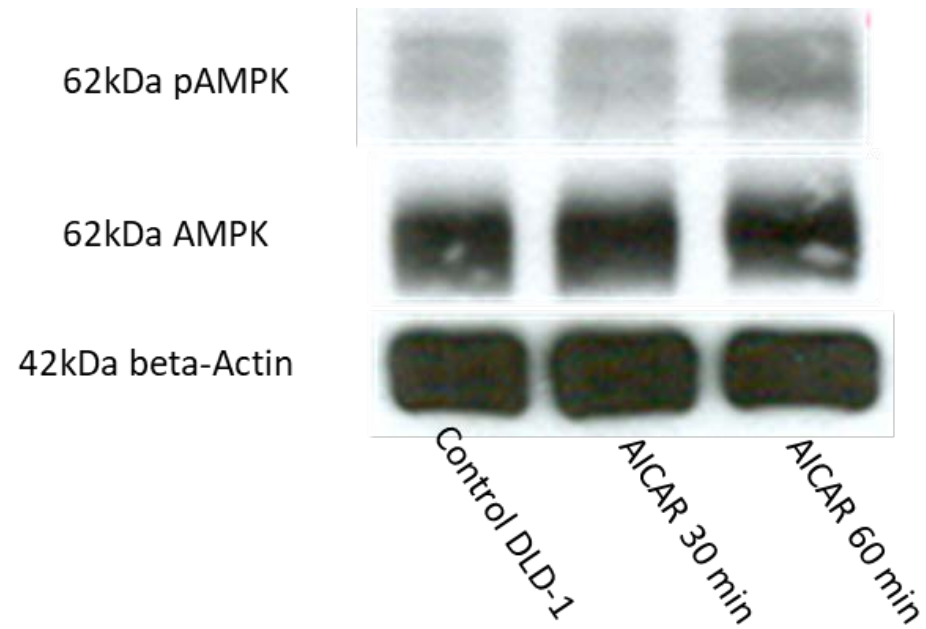

Supplemented Figure 1. The effect of AICAR on the AMPK/p-AMPK ratio.

Supplement: NIHMS1794977-supplement-Suppl_Fig_1.pdf [file NIHMS1794977-supplement-Suppl_Fig_1.pdf]
